# Supplementary material
Source: PubMed Central journal article supplement (PMC7803938)
Supplement: mmc1.pdf [file mmc1.pdf]

# Lung Histopathology in Coronavirus Disease 2019 as Compared With Severe Acute Respiratory Syndrome and H1N1 Influenza

## A Systematic Review

*Lida P. Hariri, MD, PhD; Crystal M. North, MD, MPH; Angela R. Shih, MD; Rebecca A. Israel, MD; Jason H. Maley, MD; Julian A. Villalba, MD; Vladimir Vinarsky, MD; Jonah Rubin, MD; Daniel A. Okin, MD, PhD; Alyssa Sclafani, MD; Jehan W. Alladina, MD; Jason W. Griffith, MD, PhD; Michael A. Gillette, MD, PhD; Yuval Raz, MD; Christopher J. Richards, MD; Alexandra K. Wong, MD; Amy Ly, MD; Yin P. Hung, MD, PhD; Raghu R. Chivukula, MD, PhD; Camille R. Petri, MD; Tiara F. Calhoun, MD; Laura N. Brenner, MD; Kathryn A. Hibbert, MD; Benjamin D. Medoff, MD; C. Corey Hardin, MD, PhD; James R. Stone, MD, PhD; and Mari Mino-Kenudson, MD*

CHEST 2021; 159(1):73-84

*Online supplements are not copyedited prior to posting and the author(s) take full responsibility for the accuracy of all data.*

© 2020 AMERICAN COLLEGE OF CHEST PHYSICIANS. Reproduction of this article is prohibited without written permission from the American College of Chest Physicians. See online for more details. DOI: 10.1016/j.chest.2020.09.259

## **e-Appendix 1.**

### **Supplemental Material:**

#### **COVID-19 Case Series: The Massachusetts General Hospital Experience**

The following is a summary of the clinical and histopathologic findings among the first five autopsies performed on patients who died due to COVID-19 related respiratory failure at Massachusetts General Hospital. The patients' next of kin consented to autopsy at the time of death, and the use of these data for research purposes was approved by the Partners Institutional Review Board (Protocol #2020P001146). For each case, 50 sections of lung tissue were submitted for microscopic examination (10 sections each of the 5 lobes per MGH COVID-19 autopsy protocol).

#### **Case 1:**

A 76-year-old woman with a history of diabetes, hypertension, psoriasis on methotrexate, and obesity presented to the emergency department from her assisted living facility for lethargy, chills, and hypoxemia. Several residents of the facility had been recently diagnosed with COVID-19. She was found to be febrile (38.1°C) and tachypneic, and required 2 liters per minute of oxygen via nasal canula. Chest computed tomography was notable for ill-defined, peripheral ground glass opacities in the left upper lobe and bilateral perihilar regions, and a nasopharyngeal swab was positive for SARS-CoV-2 via polymerase chain reaction. She was admitted to the inpatient medical service and treated with hydroxychloroquine, ceftriaxone, and azithromycin. Her oxygenation worsened over the ensuing 24 hours, and conversations between her family and her care team confirmed that she would not want to be intubated. Comfort-focused care continued, and she passed away peacefully with family at her bedside 5 days later from progressive hypoxemic respiratory failure.

Grossly at autopsy, the lungs showed patchy foci of consolidation. On microscopic examination, both lungs exhibited a broad area of architecturally preserved alveolar parenchyma with thick hyaline membranes

(Figures 3A and 3B) and epithelial denudation. In addition, alveolar walls showed increased cellularity with spindle fibroblast-like cells in some areas. Fibromyxoid proliferation was also seen within rare alveolar spaces (Figure 3C) consistent with acute (exudative) to early organizing (proliferative) phases of diffuse alveolar damage (DAD). There were no unequivocal viral cytopathic changes in the 50 examined sections and only rare multinucleated giant cells were identified, while immunohistochemistry for SARS nucleocapsid protein highlighted numerous alveolar macrophages and pneumocytes (Figure 3D) supporting the SARS-CoV-2 infection. Inflammation was limited to perivascular chronic inflammatory aggregates and fibrin thrombi were rare. Additional features included a focus with neutrophilic infiltrates in alveolar spaces, mucus plugs, and reactive bronchial epithelial changes consistent with focal, superimposed bronchopneumonia.

### **Case 2:**

A 76-year-old man with a history of metastatic bladder cancer status post radical cystoprostatectomy, prior pulmonary embolism, and paroxysmal atrial fibrillation on warfarin was admitted after presenting with 7-10 days of cough and nasal congestion and 3 days of fever, sore throat, myalgias and fatigue. Chest imaging was notable for bilateral hazy groundglass opacities. He was admitted to the medicine floor where he was found to be SARS-CoV-2 positive. Within 24 hours, he developed progressive hypoxemic respiratory failure necessitating intubation. He was managed with low tidal volume ventilation, treated with inhaled nitric oxide as part of a clinical trial, received hydroxychloroquine and atorvastatin, and was therapeutically anticoagulated with a heparin infusion. On hospital day 9, he developed hypothermia, bandemia, and worsening hypoxemia and was empirically treated with vancomycin and cefepime for culture negative sepsis. On hospital day 11, he developed hemodynamically significant atrial fibrillation with rapid ventricular response, worsening shock, hypoxemia, and oliguric renal insufficiency. He was started on hydrocortisone 50 mg intravenously every 6 hours and antibiotics were broadened to meropenem. Despite these interventions, his shock and hypoxemia continued to worsen. After conversations with his family, he was transitioned to comfort-focused care, and was palliatively extubated. He passed away on hospital day 12.

Grossly at autopsy, the lungs showed consolidation and hemorrhage. On microscopic examination, the majority of the parenchyma was replaced by poorly organized fibrous proliferation in alveolar walls and within airspaces (Figure 4A), consistent with an organizing (proliferative) phase of DAD. Hyaline membrane formation was limited. While no unequivocal viral cytopathic changes were seen, numerous multinucleated giant cells were present (Figure 4A) and were replacing alveolar epithelial lining focally. Multiple foci with peribronchiolar metaplasia (Figure 4B) suggested recent severe acute lung injury. In addition, both lungs exhibited numerous fibrin thrombi in small pulmonary arteries (Figure 4C) and a focus with parenchymal infarction (Figure 4D) was also noted in the left upper lobe. Large vessel thrombosis was not evident in the gross examination or microscopically examined sections.

### **Case 3:**

A 59-year-old man with a history of hypertension, hyperlipidemia, and diabetes presented with several days of fevers and dry cough. A chest radiograph was notable for bilateral diffuse ground glass and consolidative opacities with peripheral predominance. The patient was intubated in the emergency room for hypoxemic respiratory failure secondary to COVID-19, and was ventilated with a low tidal volume strategy. His ICU course was complicated by multi-pressor shock and a bacterial pneumonia superinfection. He was treated with broad spectrum antibiotics and hydroxychloroquine, but was not enrolled in clinical trials or given other experimental therapies. He subsequently developed hemodynamically destabilizing atrial fibrillation with rapid ventricular response, non-oliguric renal failure, and worsening ARDS despite prone positioning, paralysis, and inhaled nitric oxide. He was cannulated for veno-venous extracorporeal membrane oxygenation (ECMO) following 4 days of mechanical ventilation, with in-circuit CVVH. During cannulation, the patient received an unfractionated heparin bolus of 10 units per kilogram at the time of cannulation followed by a continuous infusion per institutional ECMO protocols. On hospital day 39, ECMO day 5, he developed fixed, dilated pupils with worsening shock, concerning for intracranial hemorrhage and herniation. Following conversations with family, he was transitioned to comfort-focused care and passed away with family at the bedside.

Grossly at autopsy, the lungs were diffusely consolidated. On microscopic examination, alveolar spaces were filled with histiocytes and/or neutrophils in the vast majority of the lung parenchyma (Figure 5A), suggestive of superimposed pneumonia. A region of acute (exudative) DAD, characterized by hyaline membrane formation and edema, was limited to 1 of 50 histologic sections examined.

**Case 4:**

A 60-year-old woman with a history of diabetes, hypertension, hyperlipidemia, untreated latent tuberculosis, hypothyroidism, fibromyalgia, and several sick contacts presented to the hospital with two weeks of cough, shortness of breath, fever, and myalgias. Upon arrival to the emergency room, her chest imaging was notable for diffuse, patchy, bilateral infiltrates. A nasopharyngeal swab was positive for SARS-CoV-2, and she was intubated for hypoxemic respiratory failure. She was ventilated with a low tidal volume strategy and treated with hydroxychloroquine, atorvastatin, and empiric ceftriaxone and azithromycin for community-acquired pneumonia. She received inhaled nitric oxide as part of a clinical trial, and was ventilated in prone position on hospital day 3 and paralyzed on hospital day 4 for worsening oxygenation. Her ICU course was further complicated by fevers, ventilator-associated pneumonia, shock, acute kidney injury requiring continuous renal replacement therapy, shock liver, and disseminated intravascular coagulation. After discussion with family, in the setting of multiorgan failure, she was transitioned to comfort-focused care and passed away on hospital day 6.

Grossly at autopsy, the lungs were consolidated. On microscopic examination, the lungs exhibited scattered foci with hyaline membranes and rare foci with fibroblast proliferation, consistent with acute (exudative) to early organizing (proliferative) phases of DAD. In some areas, alveolar spaces contained numerous macrophages and denuded pneumocytes, some of which exhibit marked reactive cytologic atypia suggestive of cytopathic changes (Figure 5B). Numerous fibrin thrombi were also identified in small pulmonary arteries. There was marked capillary congestion (Figure 5C) and megakaryocytes in capillaries were significantly increased (Figure 5D).

**Case 5:**

A 66-year-old man with obesity, hypertension, and diabetes presented to the hospital with one week of worsening fevers, dry cough, and dyspnea. Chest imaging was notable for bilateral diffuse hazy opacities with a retrocardiac opacity, and SARS-CoV-2 infection was confirmed by nasopharyngeal swab. He was intubated in the emergency room for hypoxemic respiratory failure secondary to COVID-19, managed with low tidal volume ventilation, and treated with broad spectrum antibiotics. He was administered hydroxychloroquine, but was not enrolled in clinical trials or given other experimental therapies. An echocardiogram was normal. On hospital day 2, he developed oliguric renal failure and CVVH was initiated. His hypoxemia continued to worsen, so he was ventilated in prone position and administered paralytics. On hospital day 4, his pressor requirement rose precipitously in the setting of ongoing refractory acidemia. After discussion with the family, the patient was transitioned to comfort-focused care, palliatively extubated, and passed away.

Grossly at autopsy, the lungs were consolidated. Microscopic examination revealed an acute (exudative) to early organizing (proliferative) phase of DAD. Other features included significant peribronchiolar metaplasia, with some mucinous metaplasia, consistent with severe acute lung injury. Numerous fibrin thrombi in small arteries and areas with parenchymal hemorrhage were present in both lungs, as was very focal neutrophilic pneumonia.

e-Figure 1.

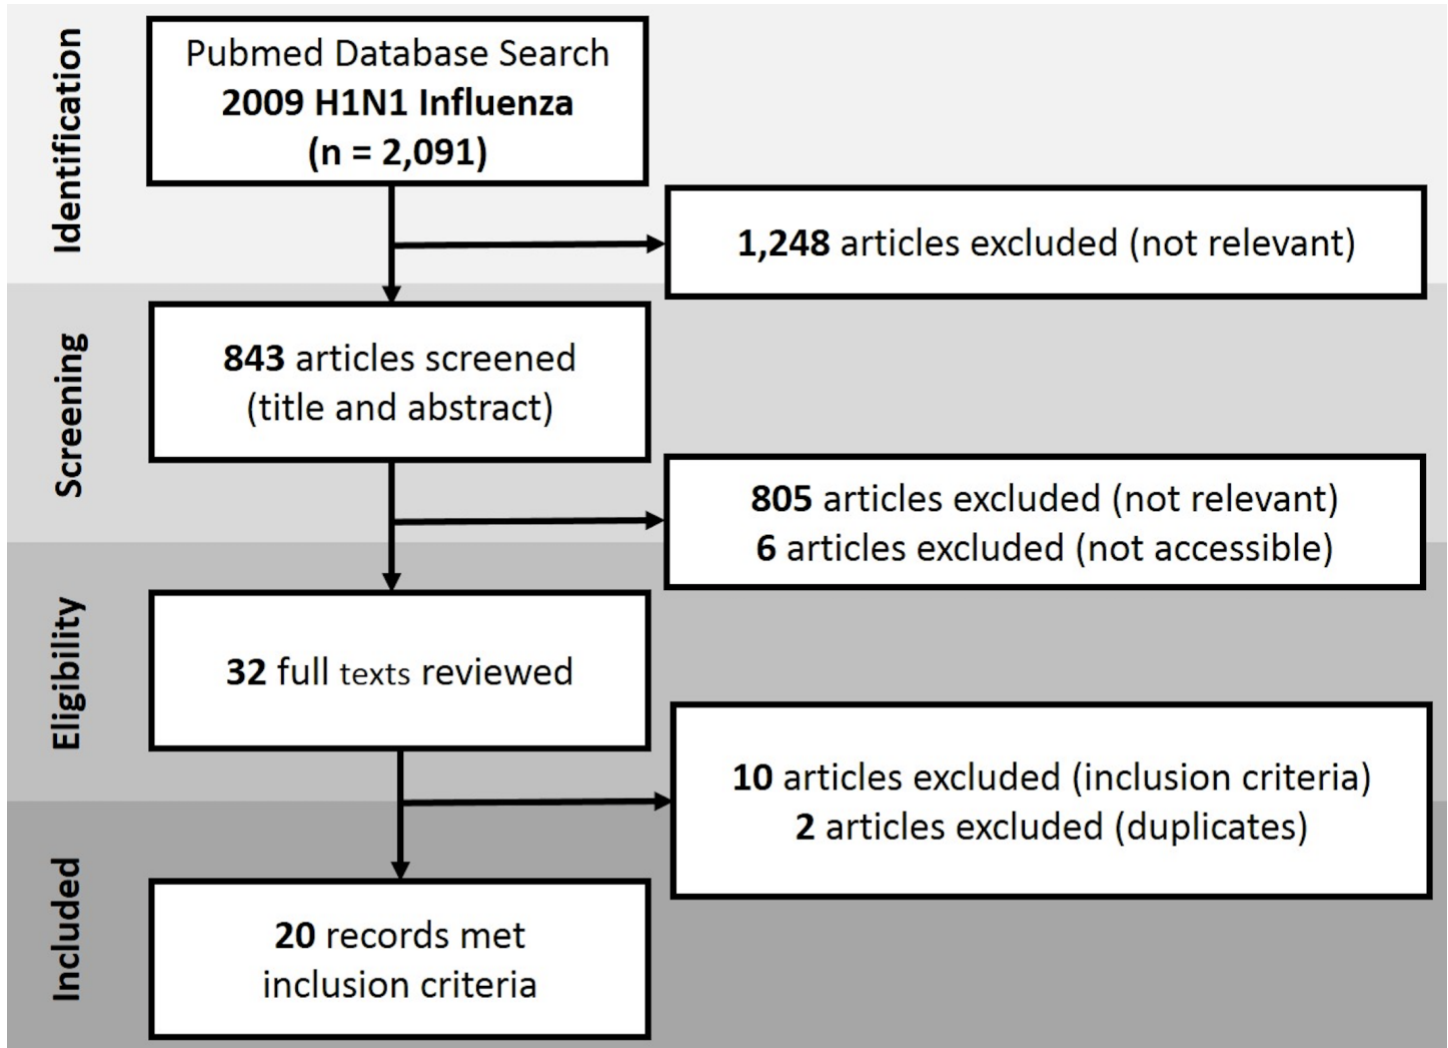

e-Figure 2.

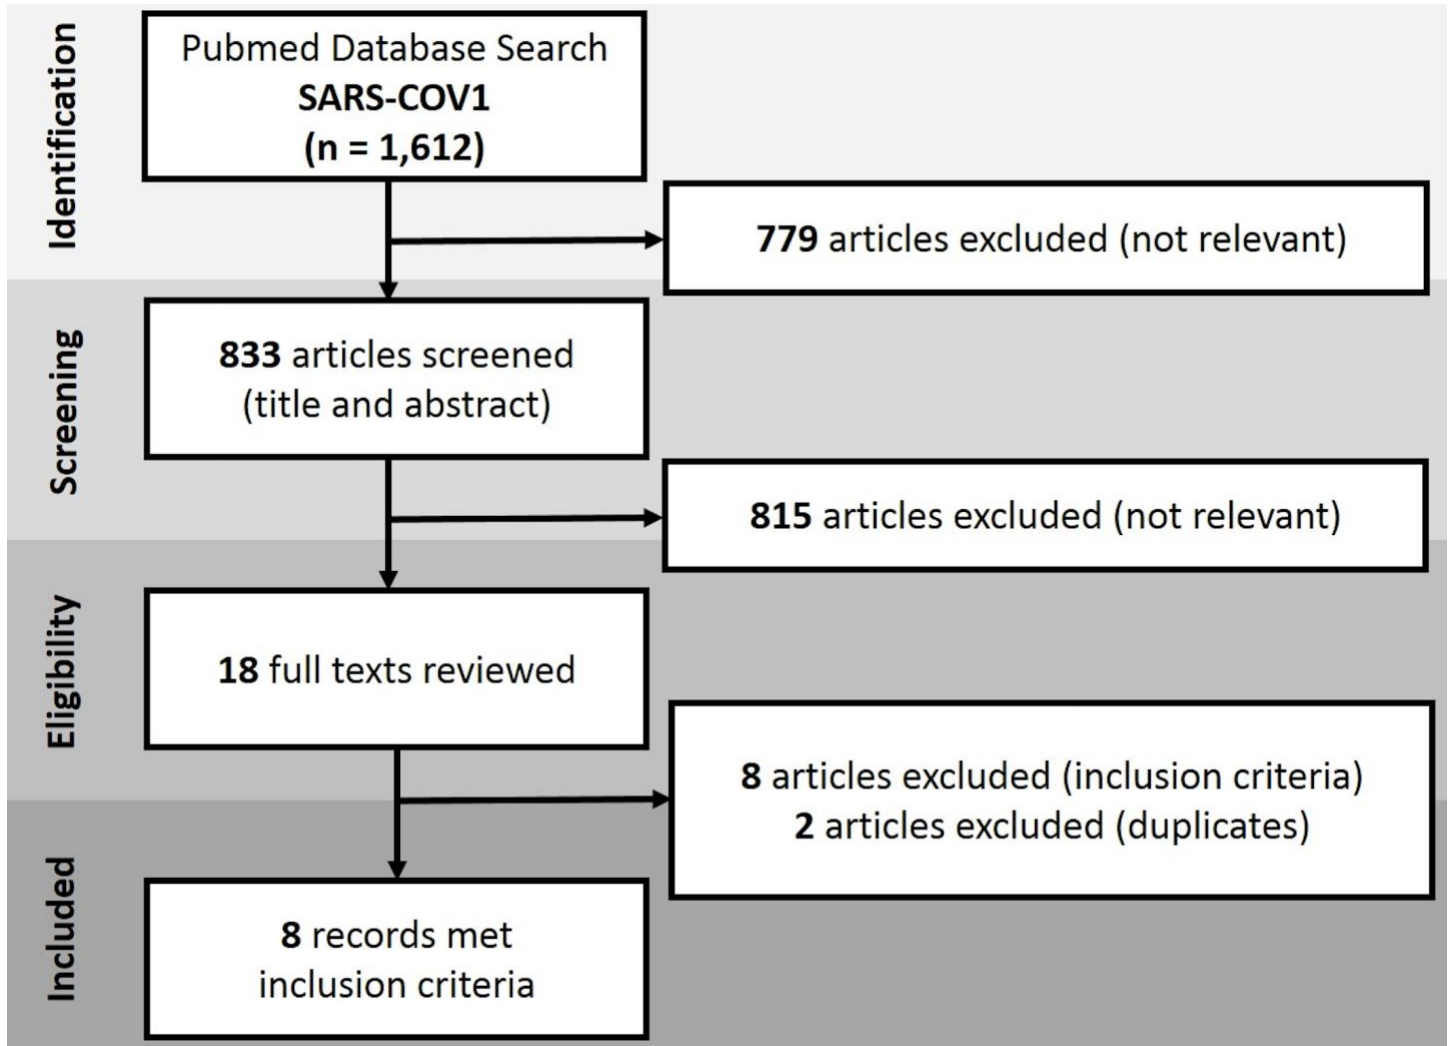



**e-Figure 3.**

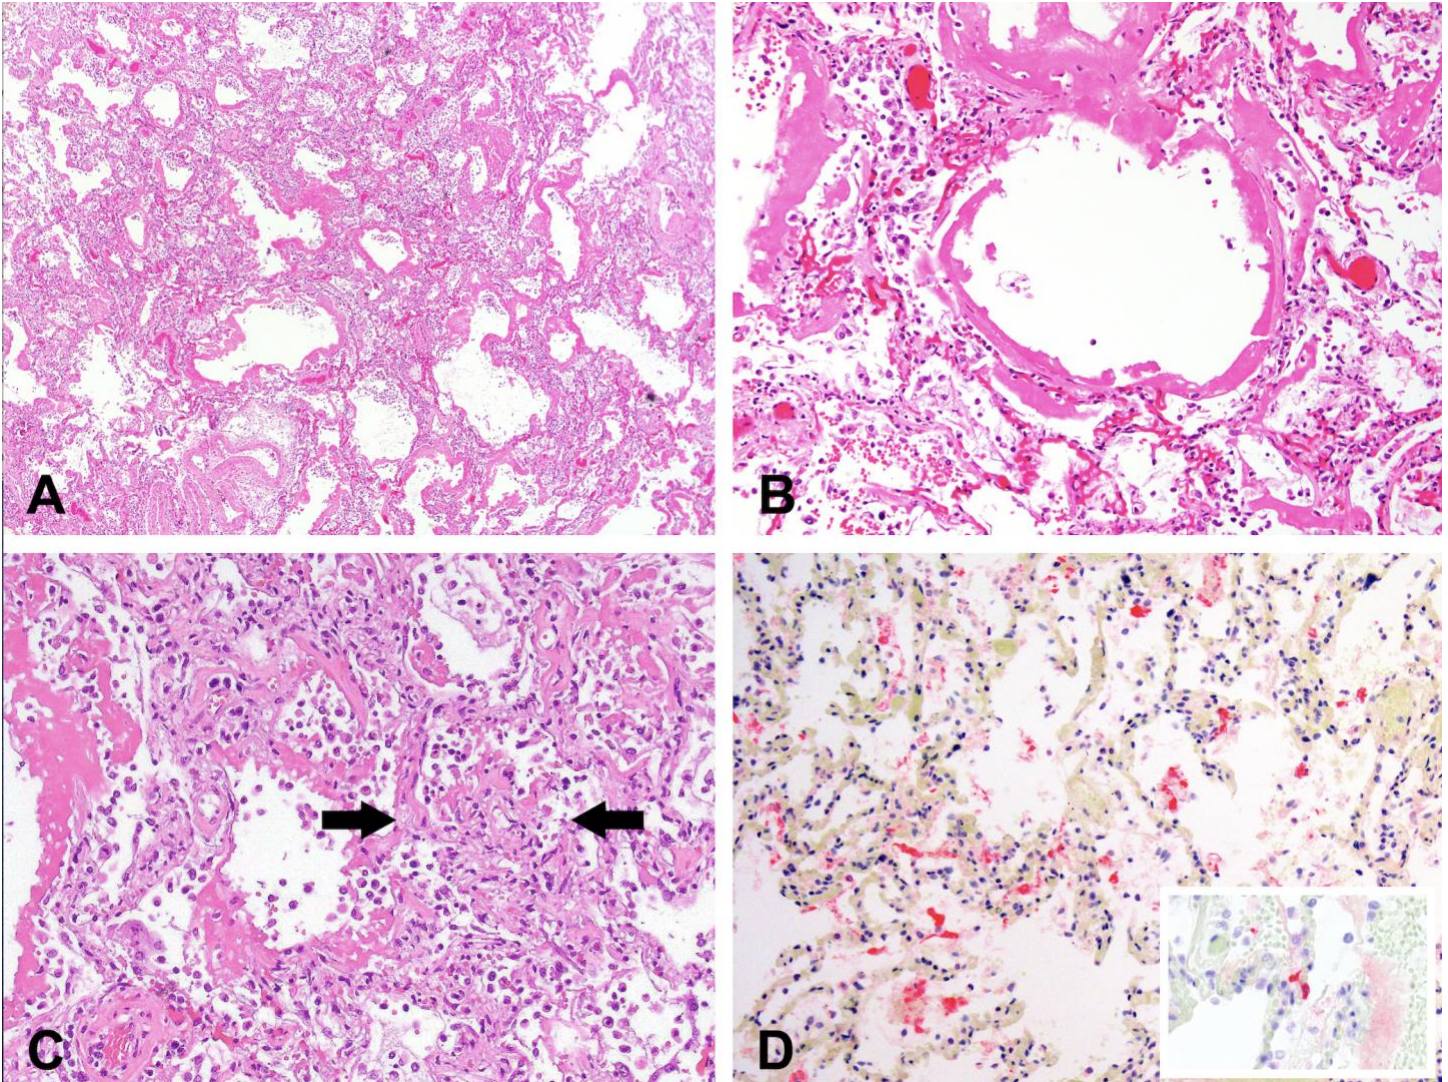

**e-Figure 4.**

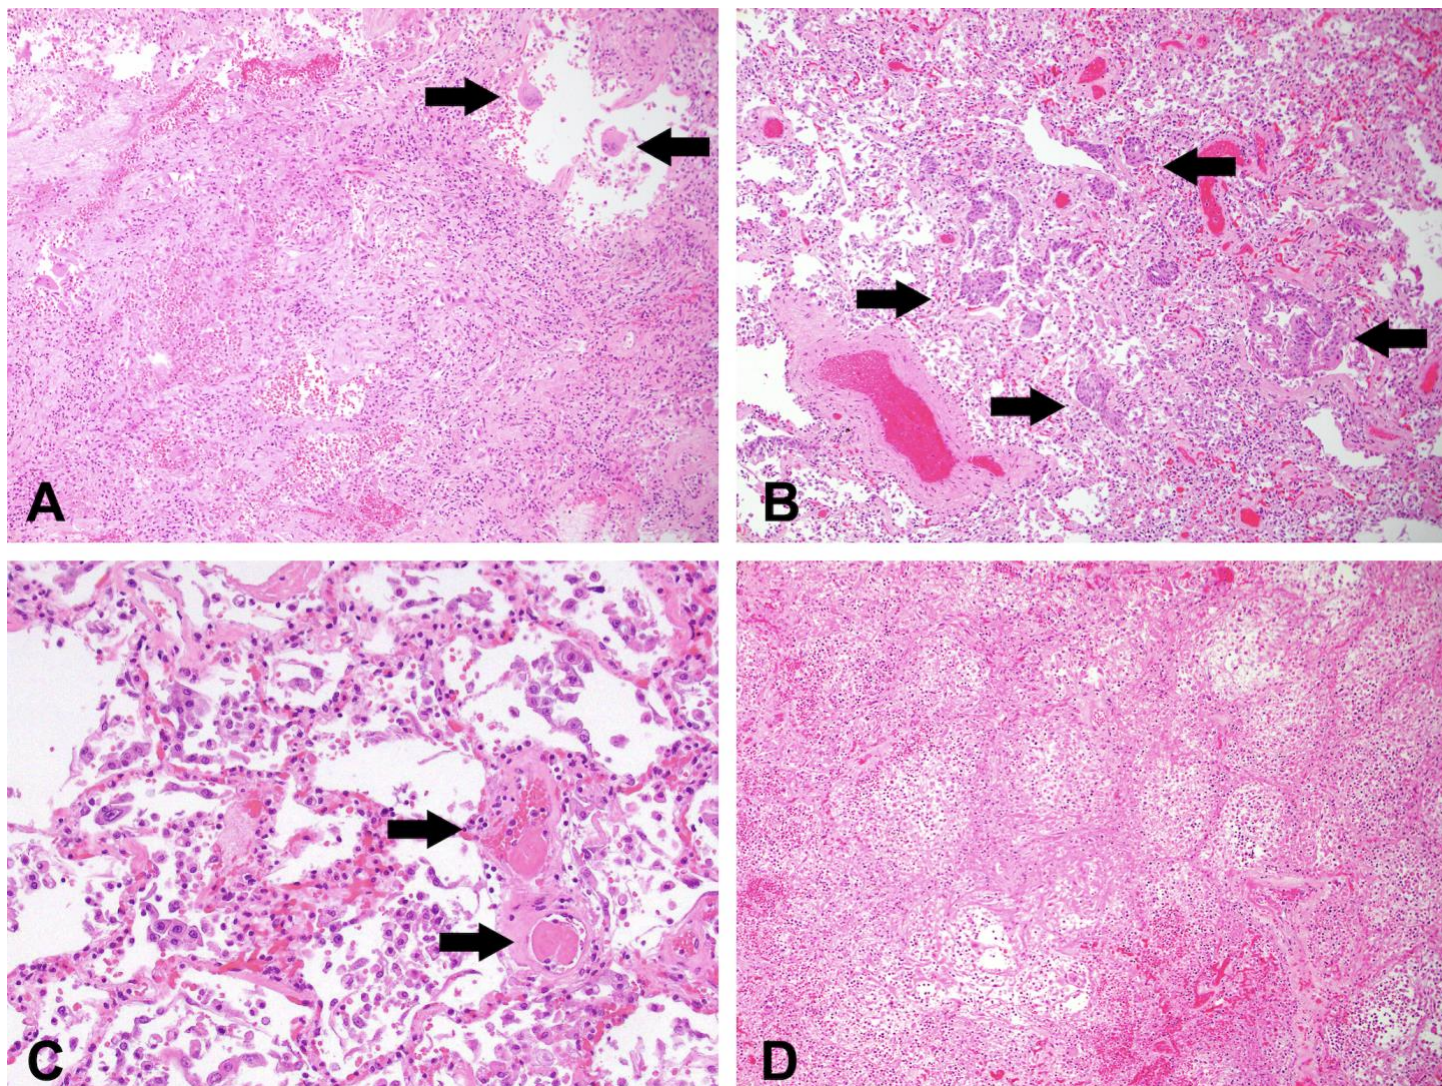

**e-Figure 5.**

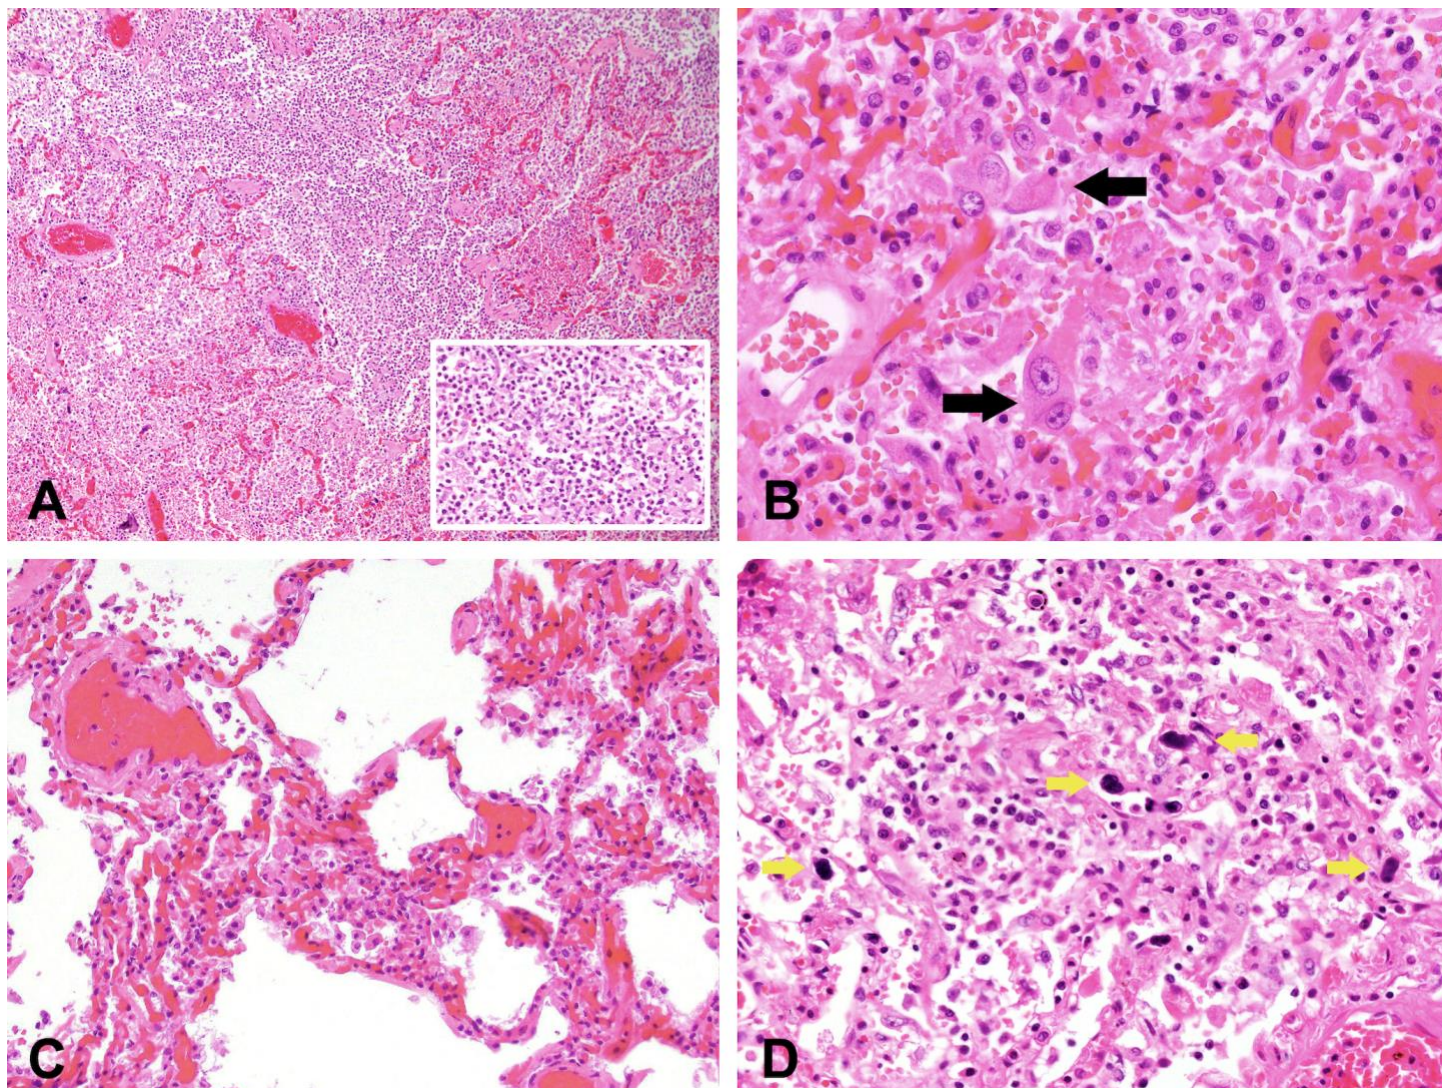

**e-Table 1. Systematic review of lung histopathology features in 2009 H1N1 influenza studies.** All reported numbers are the number of patients reported to have the respective finding within each respective study. No.: Number of total patients in the study; DAD: Diffuse alveolar damage; AFOP: acute fibrinous and organizing pneumonia; PNA: pneumonia; Pulmonary thrombosis: pulmonary vessel thrombosis. NIV: National Institute of Virology; CDC: Centers for Disease Control and Prevention. \* Cases referred to NIV in India, which is the WHO referral center for H5N1. \*\* Cases referred to US CDC.

| Study                   | Location                                 | No. patients | Method                       | DAD | AFOP | Organizing fibrosis | End stage fibrosis | Superimposed PNA | Microthrombi | Pulmonary thrombosis |
|-------------------------|------------------------------------------|--------------|------------------------------|-----|------|---------------------|--------------------|------------------|--------------|----------------------|
| Ackermann et al. (2020) | Germany/<br>Boston, USA                  | 7            | Autopsy                      | 7   | 0    | 3                   | 0                  | 0                | 7            | 4                    |
| Calore et al. (2011)    | Brazil                                   | 6            | Autopsy                      | 5   | 0    | 2                   | 0                  | 2                | 2            | 0                    |
| Capelozzi et al. (2010) | Brazil                                   | 5            | Surgical                     | 5   | 0    | 5                   | 0                  | 5                | 0            | 0                    |
| Harms et al. (2010)     | Michigan                                 | 8            | Autopsy                      | 8   | 0    | 7                   | 0                  | 6                | 7            | 5                    |
| Mauad et al. (2010)     | Sao Paulo                                | 21           | Autopsy                      | 20  | 0    | 14                  | 0                  | 8                | 6            | 4                    |
| Nakajima et al. (2012)  | Japan                                    | 20           | Autopsy                      | 6   | 0    | 12                  | 0                  | 5                | 4            | 0                    |
| Rosen et al. (2010)     | Houston, TX,<br>USA                      | 8            | Autopsy                      | 8   | 0    | 0                   | 0                  | 1                | 0            | 0                    |
| Shelke et al. (2012)*   | Cases referred<br>to NIV, Pune,<br>India | 44           | Post-mortem<br>biopsy        | 44  | 0    | 19                  | 7                  | 0                | 0            | 0                    |
| Shieh et al. (2010)**   | Cases referred<br>to CDC                 | 100          | Autopsy                      | 100 | 0    | 28                  | 0                  | 29               | 17           | 0                    |
| Fujita et al. (2014)    | Japan                                    | 4            | Autopsy (3)<br>TB biopsy (1) | 4   | 0    | 2                   | 0                  | 0                | 0            | 0                    |
| Gill et al. (2011)      | USA                                      | 34           | Autopsy                      | 25  | 0    | 9                   | 0                  | 19               | 9            | 0                    |



# CHEST™ Online Supplement

|                               |                                  |     |                    |     |      |     |    |     |     |    |
|-------------------------------|----------------------------------|-----|--------------------|-----|------|-----|----|-----|-----|----|
| Hajjar et al. (2010)          | Brazil                           | 5   | Autopsy            | 4   | 0    | 0   | 0  | 4   | 0   | 2  |
| He et al. (2010)              | China                            | 3   | Autopsy            | 3   | 0    | 1   | 0  | 1   | 2   | 0  |
| Marchiori et al. (2012)       | Brazil                           | 4   | Post mortem biopsy | 4   | 0    | 4   | 0  | 0   | 3   | 3  |
| Mukhopadhyay et al. (2010)    | New York                         | 2   | Autopsy            | 2   | 0    | 1   | 0  | 1   | 0   | 0  |
| Nin et al. (2011)             | Uruguay, Chile, Argentina, Spain | 6   | Autopsy            | 5   | 0    | 4   | 1  | 0   | 5   | 0  |
| Otto et al. (2013)            | Germany                          | 1   | Autopsy            | 0   | 1    | 1   | 0  | 0   | 0   | 0  |
| Ru et al. (2011)              | China                            | 3   | Autopsy            | 3   | 0    | 3   | 0  | 2   | 3   | 0  |
| Soto-Abraham et al. (2009)    | Mexico                           | 5   | Autopsy            | 4   | 0    | 0   | 0  | 3   | 5   | 0  |
| Takiyama et al. (2010)        | Japan                            | 1   | Autopsy            | 1   | 0    | 0   | 0  | 0   | 0   | 0  |
| <b>Total No. Patients</b>     |                                  | 287 |                    | 258 | 1    | 115 | 8  | 86  | 70  | 18 |
| <b>Proportion of Patients</b> |                                  |     |                    | 90% | 0.3% | 40% | 3% | 30% | 24% | 6% |

**e-Table 2. Systematic review of lung histopathology features in SARS studies.** All reported numbers are the number of patients reported to have the respective finding within each respective study. No.: Number of total patients in the study; DAD: Diffuse alveolar damage; AFOP: acute fibrinous and organizing pneumonia; PNA: pneumonia; Pulmonary thrombosis: pulmonary vessel thrombosis. \* In Hwang et al. (2005), AFOP was identified as the predominant pattern in six cases that were diagnosed in the report as AFOP. However, these cases were described to have a background of hyaline membranes, and therefore, the cases were also included in the DAD category.

| Study                         | Location        | No. patients | Method                                                     | DAD | AFOP | Organizing fibrosis | End stage fibrosis | Superimposed PNA | Microthrombi | Pulmonary thrombosis |
|-------------------------------|-----------------|--------------|------------------------------------------------------------|-----|------|---------------------|--------------------|------------------|--------------|----------------------|
| Cheung et al. (2004)          | Hong Kong       | 10           | Para-mortem biopsy (6); Autopsy (3); Pre-mortem biopsy (1) | 9   | 0    | 6                   | 3                  | 1                | 1            | 0                    |
| Chen et al (2003)             | China           | 7            | Autopsy                                                    | 7   | 0    | 5                   | 0                  | 7                | 6            | 1                    |
| Ding et al. (2003)            | China           | 3            | Autopsy                                                    | 3   | 0    | 1                   | 0                  | 0                | 3            | 2                    |
| Franks et al. (2003)          | Singapore       | 8            | Autopsy                                                    | 8   | 0    | 4                   | 0                  | 5                | 5            | 2                    |
| Hwang et al. (2005)*          | Toronto, Canada | 20           | Autopsy                                                    | 20  | 6*   | 6                   | 0                  | 3                | 17           | 12                   |
| Lang et al. (2003)            | China           | 3            | Autopsy                                                    | 3   | 0    | 0                   | 0                  | 0                | 3            | 0                    |
| Nicholls et al (2003)         | Kowloon         | 6            | Autopsy                                                    | 6   | 0    | 1                   | 0                  | 1                | 1            | 0                    |
| Tse et al. (2004)             | Hong Kong       | 7            | Autopsy                                                    | 7   | 0    | 7                   | 1                  | 3                | 1            | 1                    |
| <b>Total No. Patients</b>     |                 | 64           |                                                            | 63  | 6*   | 30                  | 4                  | 20               | 37           | 18                   |
| <b>Proportion of Patients</b> |                 |              |                                                            | 98% | 9%   | 47%                 | 6%                 | 31%              | 58%          | 28%                  |

**e-Table 3.** Available clinical data for included studies, part 1. All reported numbers of patients with each finding for the respective study. No.: number of patients; AF: atrial fibrillation; AIDS: Autoimmune Deficiency Syndrome; AML: Acute Myelogenous Leukemia; CVA: cerebrovascular accident; CHF: chronic heart failure; CKD: chronic kidney disease; CLL: chronic lymphocytic leukemia; COPD: chronic obstructive pulmonary disease; CPR: cardiopulmonary resuscitation; CVD: cardiovascular disease; DM: diabetes mellitus; DVT: deep vein thrombosis; DOAC: direct oral anticoagulant; ECMO: extracorporeal membrane oxygenation; ESRD: end stage renal disease (dialysis dependent); IVDU: intravenous drug use; IVIG: intravenous immunoglobulin; HCQ: hydroxychloroquine; HBV: hepatitis B viral infection (chronic); HCV: hepatitis C viral infection (chronic); HFNC: high flow nasal cannula; HIV: Human Immunodeficiency Virus; HLD: hyperlipidemia; HSTC: hematopoietic stem cell transplant; HTN: hypertension; MDS: myelodysplastic syndrome; MM: multiple myeloma; NIV: non-invasive ventilation; NSCLC: non-small cell lung cancer; OA: osteoarthritis; OSA: obstructive sleep apnea; PAD: peripheral arterial disease; PE: pulmonary embolism; PNA: pneumonia; PMH: past medical history; RA: rheumatoid arthritis; SUD: substance use disorder; UIP: usual interstitial pneumonia; VSD: ventricular septal defect

| <b>Study</b>             | <b>Location</b>                | <b>Virus</b> | <b>No. Patients</b> | <b>Male (no.)</b> | <b>Female (no.)</b> | <b>Age (yr)</b>              | <b>Comorbidities</b>                                                                           |
|--------------------------|--------------------------------|--------------|---------------------|-------------------|---------------------|------------------------------|------------------------------------------------------------------------------------------------|
| Ackermann et al., (2020) | Germany/<br>Boston, MA,<br>USA | COVID-19     | 7                   | 5                 | 2                   | 66, 68, 74, 78,<br>81 86, 96 | HTN (7), cigarette use (4), DM (3),<br>Immunosuppression (1)                                   |
| Adachi et al., (2020)    | Japan                          | COVID-19     | 1                   | 0                 | 1                   | 84                           | No notable PMH                                                                                 |
| Antinori et al., (2020)  | Italy                          | COVID-19     | 1                   | 1                 | 0                   | 73                           | DM (1), HTN (1), hyperthyroidism (1), AF (1), obesity (1)                                      |
| Barton et al. (2020)*    | Oklahoma,<br>USA               | COVID-19     | 1                   | 1                 | 0                   | 77                           | HTN, (1), splenectomy for "unspecified genetic disease" (1), DVT (1), pancreatitis (1), OA (1) |
| Buja et al., (2020)      | USA                            | COVID-19     | 3                   | 3                 | 0                   | 34, 48, 62                   | obesity (3), HTN (1), CHF (1), DM (1),<br>microcytic anemia (1)                                |
| Carsana et al. (2020)    | Milan, Italy                   | COVID-19     | 38                  | 33                | 5                   | Mean 62                      | HTN (18),CVD (11), DM (9), past malignancy (4), COPD (3)                                       |
| Copin et al.             | Lille, France                  | COVID-19     | 6                   | Not               | Not                 | Not reported                 | Not reported                                                                                   |



| (2020)                            |                             |          |    | reported     | reported     |                                        |                                                                                                                                                                                                 |
|-----------------------------------|-----------------------------|----------|----|--------------|--------------|----------------------------------------|-------------------------------------------------------------------------------------------------------------------------------------------------------------------------------------------------|
| Craver et al (2020)               | USA                         | COVID-19 | 1  | 1            | 0            | 17                                     | No notable PMH                                                                                                                                                                                  |
| Fox et al. (2020)                 | New Orleans/ Louisiana, USA | COVID-19 | 10 | Not reported | Not reported | 44, 44, 53, 60, 63, 66, 68, 76, 78, 78 | HTN (7), DM (5), CKD (1), OSA (1), CHF (1), COPD (1), AF (1), Polymyositis (1), RA (1)                                                                                                          |
| Konopka, Wilson, and Myers (2020) | Michigan, USA               | COVID-19 | 1  | 1            | 0            | 37                                     | Asthma (1), DM2 (1)                                                                                                                                                                             |
| Konopka et al (2020)              | Michigan, USA               | COVID-19 | 8  | 5            | 3            | 37, 46, 44, 49, 55, 63, 67, 79         | DM (5), obesity (5), asthma (2), CVD (2), HTN (1), SUD (1), ESRD (1), renal transplant (1), bipolar disorder (1)                                                                                |
| Lax et al. (2020)                 | Graz, Austria               | COVID-19 | 11 | 8            | 3            | Mean 80.5 (range 66-91)                | HTN (9), DM2 (5), CAD (3), prior malignancy (2) COPD (2), cerebrovascular disease (4), dementia (3)                                                                                             |
| Magro et al. (2020)               | New York, NY, USA           | COVID-19 | 2  | 3            | 2            | 32, 40, 62, 66, 73                     | Obesity (2), CVD (1), CHF (1), ESRD (1), cigarette use (1), OSA (1), DM (1), prediabetes (1), treated HCV (1), anabolic steroid use (1)                                                         |
| Martines et al. (2020)            | USA                         | COVID-19 | 8  | 4            | 4            | Median 73.5                            | HTN (6), CKD (6), CVD (6), obesity (5), DM (4), immunocompromising condition (3), ESRD (2), CKD (2)                                                                                             |
| Menter et al. (2020)              | Basel/Liestal, Switzerland  | COVID-19 | 21 | 17           | 4            | Mean 76 (range 53-96)                  | HTN (21), CVD (15), cigarette use (8), pre-obesity (10), obesity (6), DM2 (7), COPD (3), chronic neurologic disease (5), cancer (3), liver disease (2), CKD (4), acquired immunosuppression (1) |





|                                   |                     |          |    |                                             |   |                                        |                                                                                                                                                                                                                                             |
|-----------------------------------|---------------------|----------|----|---------------------------------------------|---|----------------------------------------|---------------------------------------------------------------------------------------------------------------------------------------------------------------------------------------------------------------------------------------------|
| Nunes Duarte-Neto et al. (2020)** | São Paulo, Brazil   | COVID-19 | 9  | Data combined for PCR positive and negative |   |                                        |                                                                                                                                                                                                                                             |
| Schaller et al. (2020)            | Augberg, Germany    | COVID-19 | 10 | 7                                           | 3 | Median 79 (range 64-90)                | HTN (7), CVD (5), AFA (4), CKD (3), COPD (2), obesity (2), DM (2), cancer (2), hypothyroidism (2), dementia (1), hyperthyroid (1), hypertrophic cardiomyopathy (1), fatty liver (1), CAD (1)                                                |
| Sekulic et al. (2020)             | Cleveland, OH, USA  | COVID-19 | 2  | 2                                           | 0 | 54, 81                                 | DM (2), HTN (2), dementia (1), lung mass (1), CVD (1), AF (1), CHF (1), PAD (1), dyslipidemia (1), CKD (1), cigarette use (1), CVA (1)                                                                                                      |
| Suess et al. (2020)               | Gallen, Switzerland | COVID-19 | 1  | 1                                           | 0 | 59                                     | DM                                                                                                                                                                                                                                          |
| Tian, Xiong, et al. (2020)        | Wuhan, China        | COVID-19 | 4  | 3                                           | 1 | 59, 74, 78, 81,                        | CLL (1), cirrhosis (1), variceal bleed (1), DM (1), HTN (1), renal transplant >3 mo (1)                                                                                                                                                     |
| Wichmann et al., (2020)           | Hamburg, Germany    | COVID-19 | 12 | 9                                           | 3 | 52, 54, 63, 66, 70, 71, 75, 82, 84, 87 | CHF (6), obesity (3), HTN (3), DM (3), Parkinson's Disease (2), PAD (1), CKD (2), cigarette use (2), AF (2), granulomatous pneumopathy (1), dementia (1), epilepsy (1), trisomy 21 (1), NSCLC (1), COPD (1), ulcerative colitis (1), asthma |
| Wu et al. (2020)                  | China               | COVID-19 | 10 | 7                                           | 3 | Mean (SD) 70+/-16(49-87)               | Not reported                                                                                                                                                                                                                                |
| Xu et al. (2020)                  | Beijing, China      | COVID-19 | 1  | 1                                           | 0 | 50                                     | Not reported                                                                                                                                                                                                                                |



|                         |                        |          |    |    |    |                                                                                           |                                                                                                            |
|-------------------------|------------------------|----------|----|----|----|-------------------------------------------------------------------------------------------|------------------------------------------------------------------------------------------------------------|
| Yan et al. (2020)       | San Antonio, TX, USA   | COVID-19 | 1  | 0  | 1  | 44                                                                                        | Obesity (!)                                                                                                |
| Yao XH et al. (2020)    | Congqing, China        | COVID-19 | 1  | 0  | 1  | 78                                                                                        | Not reported                                                                                               |
| Zhang et al. (2020)     | Wuhan, China           | COVID-19 | 1  | 1  | 0  | 72                                                                                        | DM (1), HTN (1)                                                                                            |
| Ackermann et al. (2020) | Germany/<br>Boston, MA | H1N1     | 7  | 5  | 2  | Mean (male)<br>62.5+/-4.9<br>Mean (female)<br>55.4+/-10.9                                 | Not reported                                                                                               |
| Calore et al. (2011)    | Brazil                 | H1N1     | 6  | 5  | 1  | 23, 38, 41, 41,<br>43, 48,                                                                | No comorbidities (2), obesity (2), DM (1), cerebral palsy (1), HTN (1), long-term anabolic steroid use (1) |
| Capelozzi et al. (2010) | Brazil                 | H1N1     | 5  | 2  | 3  | 35, 35, 39,<br>51,81                                                                      | RA (1)                                                                                                     |
| Harms et al. (2010)     | Michigan, USA          | H1N1     | 8  | 8  | 0  | 23, 26, 28, 31,<br>43, 51, 57, 57                                                         | HTN (3), asthma (1), COPD (1)                                                                              |
| Mauad et al. (2010)     | São Paulo, Brazil      | H1N1     | 21 | 12 | 9  | Median 34<br>(range 1-68)                                                                 | CVD (7), COPD (2)                                                                                          |
| Nakajima et al. (2012)  | Japan                  | H1N1     | 20 | 14 | 6  | 25, 30, 33, 42,<br>45, 49, 81, 75,<br>2, 6, 13, 15,<br>24, 30, 33, 40,<br>41, 44, 69, 72, | HTN (4), CHF (2), COPD (2)                                                                                 |
| Rosen et al. (2010)     | Houston, TX, USA       | H1N1     | 8  | 8  | 0  | 1, 26, 26, 27,<br>27, 34, 43, 54                                                          | Obesity (3)                                                                                                |
| Shelke et al. (2012)*   | Cases referred to      | H1N1     | 44 | 15 | 29 | Median 40<br>(range 18-60)                                                                | HTN (1), DM (1)                                                                                            |



|                            |                                  |      |     |    |    |                               |                                                                                                                                                                                                                                                                                                    |
|----------------------------|----------------------------------|------|-----|----|----|-------------------------------|----------------------------------------------------------------------------------------------------------------------------------------------------------------------------------------------------------------------------------------------------------------------------------------------------|
|                            | NIV, Prune, India                |      |     |    |    |                               |                                                                                                                                                                                                                                                                                                    |
| Shieh et al. (2010)**      | Cases referred to CDC            | H1N1 | 100 | 51 | 49 | Median 36 (range 1-84)        | Obesity (43), CVD (23),                                                                                                                                                                                                                                                                            |
| Fujita et al. (2014)       | Japan                            | H1N1 | 4   | 2  | 2  | 59, 37, 97, 24                | Mental retardation (1), obesity (1)                                                                                                                                                                                                                                                                |
| Gill et al. (2011)         | Michigan, USA                    | H1N1 | 34  | 17 | 17 | Median 41.5 (range 0.16 - 72) | Obesity (16), HTN (13), asthma (7), DM (5), CVD (5), IVDU (4), HIV/AIDS (3), down syndrome (1), cirrhosis (1), CHF (1), OSA (2), MM with HSCT (1), psoriasis (1), CKD (1), pregnancy (1), AML (1), hypertrophic cardiomyopathy (1), MDS (1), emphysema (1), substance use (1), home oxygen use (1) |
| Hajjar et al. (2010)       | Graz, Austria                    | H1N1 | 8   | 4  | 4  | median 41.5 (range 0.16-72)   | Solid malignancy (5), hematologic malignancy (3), cardiovascular chronic disease (3), hypothyroidism (2), COPD (1), M (2),                                                                                                                                                                         |
| He et al. (2010)           | New York, NY, USA                | H1N1 | 3   | 2  | 1  | 1, 18, 44                     | Not reported                                                                                                                                                                                                                                                                                       |
| Marchiori et al. (2012)    | Brazil                           | H1N1 | 4   | 0  | 4  | 21, 21, 35, 65                | HIV/AIDS (1), pregnancy (1), CHF (1), liver dysfunction (1), CKD (1), neurodevelopmental disease (1)                                                                                                                                                                                               |
| Mukhopadhyay et al. (2010) | New York, USA                    | H1N1 | 2   | 1  | 1  | 36, 46                        | Alcoholism (1), obesity (1), CVA (1), HCV (1), depression (1), anxiety (1)                                                                                                                                                                                                                         |
| Nin et al. (2011)          | Uruguay, Chile, Argentina, Spain | H1N1 | 6   | 2  | 4  | 15, 22, 26, 32, 37, 50        | Pregnancy (3), asthma (2), obesity (1)                                                                                                                                                                                                                                                             |



|                            |                 |      |    |   |   |                                        |                                                              |
|----------------------------|-----------------|------|----|---|---|----------------------------------------|--------------------------------------------------------------|
| Otto et al. (2013)         | Germany         | H1N1 | 1  | 0 | 1 | 66                                     | UIP status post lung transplant                              |
| Ru et al. (2011)           | China           | H1N1 | 3  | 3 | 0 | 41, 72, 79                             | Not reported                                                 |
| Soto-Abraham et al. (2009) | Mexico          | H1N1 | 5  | 4 | 1 | 22, 26, 28, 37, 83                     | Not reported                                                 |
| Takiyama et al. (2010)     | Japan           | H1N1 | 1  | 0 | 1 | 41                                     | Obesity                                                      |
| Cheung et al. (2004)       | Hong Kong       | SARS | 10 | 7 | 7 | 31, 39, 40, 42, 45, 50, 53, 67, 73, 78 | HTN (1), VSD (1), nephrotic syndrome (1), CVD (1), HLD (1)   |
| Chen et al (2003)          | China           | SARS | 7  | 5 | 5 | 34, 40, 41, 43, 45, 47, 51             | Not reported                                                 |
| Ding et al. (2003)         | China           | SARS | 3  | 2 | 2 | 25, 57, 62                             | Not reported                                                 |
| Franks et al. (2003)       | Singapore       | SARS | 8  | 6 | 6 | 18, 38, 39, 43, 50, 53, 67, 68         | DM (1)                                                       |
| Hwang et al. (2005)*       | Toronto, Canada | SARS | 20 | 9 | 9 | mean = 68.1 (range 43-99)              | Not reported                                                 |
| Lange et al (2003)         | China           | SARS | 3  | 1 | 1 | 64, 69, 73                             | DM (2), lung cancer (1), HTN (1), "heart disease" (1)        |
| Nicholis et al (2003)      | Kowloon         | SARS | 6  | 4 | 4 | 37, 39, 49, 53, 64, 77                 | HTN, HBV cirrhosis with portal hypertension                  |
| Tse et al (2004)           | Hong Kong       | SARS | 7  | 6 | 6 | 44, 63, 69, 76, 78, 81, 81             | Chronic liver disease (2), CVD(2), MDS(1), COPD (1), HTN (1) |

**e-Table 3.** Available clinical data for included studies, part 2.

| <b>Study</b>             | <b>Location</b>                   | <b>Virus</b> | <b>No, Patients</b> | <b>Mechanical Ventilation (no.)</b> | <b>Therapy</b>                                                                          | <b>Cause of death</b>                                     |
|--------------------------|-----------------------------------|--------------|---------------------|-------------------------------------|-----------------------------------------------------------------------------------------|-----------------------------------------------------------|
| Ackermann et al., (2020) | Germany/<br>Boston, MA,<br>USA    | COVID-19     | 7                   | NIV (2)                             | Not reported                                                                            | Respiratory failure (6),<br>cardiorespiratory failure (1) |
| Adachi et al., (2020)    | Japan                             | COVID-19     | 1                   | No                                  | Antibiotics (1), steroids (1),<br>lopinavir/ritonavir (1)                               | Respiratory failure (1)                                   |
| Antinori et al., (2020)  | Italy                             | COVID-19     | 1                   | Yes (1)                             | Antibiotics (1), amphotericin<br>(1) Lopinavir/ritonavir<br>(1),HCQ (1)                 | Respiratory failure, (1) shock<br>(1)                     |
| Barton et al. (2020)*    | Oklahoma,<br>USA                  | COVID-19     | 1                   | Yes (1)                             | CPR (1)                                                                                 | "COVID-19"                                                |
| Buja et al., (2020)      | USA                               | COVID-19     | 3                   | No                                  | Antibiotics (3)                                                                         | Respiratory failure with PEA<br>(1), unknown (2)          |
| Carsana et al. (2020)    | Milan, Italy                      | COVID-19     | 38                  | Not reported                        | Not reported                                                                            | Not reported                                              |
| Copin et al. (2020)      | Lille, France                     | COVID-19     | 6                   | Not reported                        | Not reported                                                                            | Not reported                                              |
| Craver et al., (2020)    | USA                               | COVID-19     | 1                   | No                                  | CPR                                                                                     | Cardiac arrest (1)                                        |
| Fox et al. (2020)        | New Orleans/<br>Louisiana,<br>USA | COVID-19     | 10                  | Yes (9)                             | Antibiotics (7),<br>dexamethasone (1), HCQ (2),<br>cisatracurium (1), amiodarone<br>(1) | VT arrest (1), not reported (9)                           |
| Konopka,                 | Michigan,                         | COVID-19     | 1                   | Yes (1)                             | Antibiotics (1), HCQ (1),                                                               | Care withdrawn (1)                                        |



|                                   |                             |          |    |              |                                                                                                    |                                                  |
|-----------------------------------|-----------------------------|----------|----|--------------|----------------------------------------------------------------------------------------------------|--------------------------------------------------|
| Wilson, and Myers (2020)          | USA                         |          |    |              | steroids (1), ECMO (1)                                                                             |                                                  |
| Konopka et al (2020)              | Michigan, USA               | COVID-19 | 8  | Yes (3)      | Antibiotics (3), HCQ (2), sarilumab (1) steroids (1), tocilizumab (1),                             | Not reported                                     |
| Lax et al. (2020)                 | Graz, Austria               | COVID-19 | 11 | Yes (2)      | prophylactic enoxaparin (9), antibiotics (8), antiplatelet (7), therapeutic DOAC (1), steroids (1) | Not reported                                     |
| Magro et al. (2020)               | New York, NY, USA           | COVID-19 | 2  | Yes (1)      | No therapy (1), not reported (1)                                                                   | Not reported                                     |
| Martines et al. (2020)            | USA                         | COVID-19 | 8  | Yes (6)      | Not reported                                                                                       | Not reported                                     |
| Menter et al. (2020)              | Basel/ Liestal, Switzerland | COVID-19 | 21 | Yes (6)      | Anticoagulation (11)                                                                               | "Multifactorial"                                 |
| Nunes Duarte-Neto et al. (2020)** | São Paulo, Brazil           | COVID-19 | 9  | Yes (7)      | Not reported                                                                                       | Not reported                                     |
| Schaller et al. (2020)            | Augberg, Germany            | COVID-19 | 10 | Yes (4)      | Not reported                                                                                       | Not reported                                     |
| Sekulic et al. (2020)             | Cleveland, OH, USA          | COVID-19 | 2  | Yes (1)      | Antibiotics (1), therapeutic anticoagulation (1) remdesivir (1)                                    | Respiratory failure (1), multi-organ failure (1) |
| Suess et al. (2020)               | Gallen, Switzerland         | COVID-19 | 1  | No           | Pain medication (1), cough suppressant (1)                                                         | Unknown (found dead at home)                     |
| Tian, Xiong, et al. (2020)        | Wuhan, China                | COVID-19 | 4  | Not reported | Antibiotics (4), "antiviral therapy" (4), oxygen (4)                                               | Not reported                                     |



|                         |                      |          |    |                  |                                                                   |                                                         |
|-------------------------|----------------------|----------|----|------------------|-------------------------------------------------------------------|---------------------------------------------------------|
| Wichmann et al., (2020) | Hamburg, Germany     | COVID-19 | 12 | Yes (4), NIV (1) | Not reported                                                      | respiratory failure/PNA (7), cardiac arrest (3), PE (2) |
| Wu et al. (2020)        | China                | COVID-19 | 10 | Not reported     | Not reported                                                      | Not reported                                            |
| Xu et al. (2020)        | Beijing, China       | COVID-19 | 1  | No (HFNC)        | Not reported                                                      | Cardiac arrest (1)                                      |
| Yan et al. (2020)       | San Antonio, TX, USA | COVID-19 | 1  | Yes (1)          | HCQ (1), azithromycin (1), tocilizumab (1), prone positioning (1) | Multi-organ failure (1)                                 |
| Yao XH et al. (2020)    | Congqing, China      | COVID-19 | 1  | No               | Not reported                                                      | Cardiac arrest (1)                                      |
| Zhang et al. (2020)     | Wuhan, China         | COVID-19 | 1  | Yes (1)          | Not reported                                                      | Not reported                                            |
| Ackermann et al. (2020) | Germany/Boston, MA   | H1N1     | 7  | Yes (5)          | Not reported                                                      | Respiratory failure (7)                                 |
| Calore et al. (2011)    | Brazil               | H1N1     | 6  | Yes (6)          | Not reported                                                      | Respiratory failure (6), PE (2)                         |
| Capelozzi et al. (2010) | Brazil               | H1N1     | 5  | Yes (5)          | Oseltamivir (5), steroids (5)                                     | Multi-organ failure (2)                                 |
| Harms et al. (2010)     | Michigan, USA        | H1N1     | 8  | Yes (8)          | Not reported                                                      | Not reported                                            |
| Mauad et al. (2010)     | São Paulo, Brazil    | H1N1     | 21 | Yes (21)         | Oseltamivir (16), steroids (12)                                   | Not reported                                            |
| Nakajima et al. (2012)  | Japan                | H1N1     | 20 | Yes (20)         | Oseltamivir (14), antibiotics (10)                                | Not reported                                            |
| Rosen et al. (2010)     | Houston, TX, USA     | H1N1     | 8  | Not reported     | Not reported                                                      | Not reported                                            |



|                            |                                     |      |     |                  |                                                                         |                                                  |
|----------------------------|-------------------------------------|------|-----|------------------|-------------------------------------------------------------------------|--------------------------------------------------|
| Shelke et al. (2012)*      | Cases referred to NIV, Prune, India | H1N1 | 44  | Yes (17)         | Oseltamivir (26)                                                        | Not reported                                     |
| Shieh et al. (2010)**      | Cases referred to CDC               | H1N1 | 100 | Yes (42)         | Oseltamivir (44)                                                        | Not reported                                     |
| Fujita et al. (2014)       | Japan                               | H1N1 | 4   | Yes (4)          | ECMO (3), oseltamivir (2), peramivir (1), laninamivir (1)               | Respiratory failure (3)                          |
| Gill et al. (2011)         | Michigan, USA                       | H1N1 | 34  | Yes (12)         | Oseltamivir (22)                                                        | Not reported                                     |
| Hajjar et al. (2010)       | Graz, Austria                       | H1N1 | 8   | Yes (5), NIV (3) | Steroids (8), oseltamivir (8), antibiotics (8)                          | Not reported (5)                                 |
| He et al. (2010)           | New York, NY, USA                   | H1N1 | 3   | Not reported     | Not reported                                                            | Not reported                                     |
| Marchiori et al. (2012)    | Brazil                              | H1N1 | 4   | Yes (4)          | Oseltamivir (4), antibiotics (4), steroids (4)                          | Respiratory failure (4)                          |
| Mukhopadhyay et al. (2010) | New York, USA                       | H1N1 | 2   | Yes (2)          | Oseltamivir (2), antibiotics (2)                                        | Respiratory failure (2)                          |
| Nin et al. (2011)          | Uruguay, Chile, Argentina, Spain    | H1N1 | 6   | Yes (6)          | Oseltamivir (6), antibiotics (6), steroids (3)                          | Respiratory failure (5), multi-organ failure (1) |
| Otto et al. (2013)         | Germany                             | H1N1 | 1   | Yes              | Steroids (1), oseltamivir (1), zanamivir (1), antibiotics (1), ECMO (1) | Respiratory failure                              |
| Ru et al. (2011)           | China                               | H1N1 | 3   | Not reported     | Not reported                                                            | Not reported                                     |





|                            |                 |      |    |              |                                                                                                          |                                                                      |
|----------------------------|-----------------|------|----|--------------|----------------------------------------------------------------------------------------------------------|----------------------------------------------------------------------|
| Soto-Abraham et al. (2009) | Mexico          | H1N1 | 5  | Not reported | Antibiotics (4)                                                                                          | Respiratory failure (4), CVA (1)                                     |
| Takiyama et al. (2010)     | Japan           | H1N1 | 1  | No           | None                                                                                                     | Unknown (found dead)                                                 |
| Cheung et al. (2004)       | Hong Kong       | SARS | 10 | Yes (9)      | Antibiotics (10), steroids (9), ribavirin (9)                                                            | Respiratory failure (10)                                             |
| Chen et al (2003)          | China           | SARS | 7  | Not reported | Steroids (5)                                                                                             | Respiratory failure (7)                                              |
| Ding et al. (2003)         | China           | SARS | 3  | Not reported | Not reported                                                                                             | Not reported                                                         |
| Franks et al. (2003)       | Singapore       | SARS | 8  | Not reported | Not reported                                                                                             | Not reported                                                         |
| Hwang et al. (2005)*       | Toronto, Canada | SARS | 20 | Not reported | Not reported                                                                                             | Not reported                                                         |
| Lange et al (2003)         | China           | SARS | 3  | Not reported | Steroids (1), not reported (2)                                                                           | Not reported                                                         |
| Nicholis et al (2003)      | Kowloon         | SARS | 6  | Yes (6)      | Antibiotics (6), ribavirin (3), , oseltamivir (1), foscarnet (1), IVIG (1), steroids (3), amantadine (1) | Respiratory failure (6), cardiac arrests (1), multiorgan failure (1) |
| Tse et al (2004)           | Hong Kong       | SARS | 7  | Yes (6)      | Ribavirin (6), hydrocortisone (5)                                                                        | Respiratory failure (7)                                              |

203495
